# Supplementary material for: MUC 15 Promotes Osteosarcoma Cell Proliferation, Migration and Invasion through Livin, MMP-2/MMP-9 and Wnt/β-Catenin Signal Pathway
Source: PubMed Central journal article supplement (PMC7739004; doi:10.7150/jca.49641), 2021-01-01
Supplement: jcav12p0467s1.pdf [file jcav12p0467s1.pdf]

**Fig.S1 Details of the 41 OS patients**

| No. | Gender | Age | Tumor location         | Surgical plan                                             | Enneking stage | The follow-up                                        | IRS |
|-----|--------|-----|------------------------|-----------------------------------------------------------|----------------|------------------------------------------------------|-----|
| 1   | Female | 15  | Right distal femur     | Tumor resection and prosthetic knee replacement           | Ila            | Lost follow-up in the 30 <sup>th</sup> month         | 2.2 |
| 2   | Female | 21  | Right distal femur     | Hip disarticulation                                       | IIIb           | Lung metastasis/ Died in the 16 <sup>th</sup> month  | 6.2 |
| 3   | Male   | 18  | Proximal right humerus | Tumor resection and prosthetic shoulder joint replacement | Ilb            | Tumor free                                           | 5.6 |
| 4   | Male   | 21  | Proximal left tibia    | Tumor resection and prosthetic knee replacement           | Ila            | Lost follow-up in the 27 <sup>th</sup> month         | 3.7 |
| 5   | Female | 30  | Left distal tibia      | Knee disarticulation                                      | Ilb            | Lost follow-up in the 12 <sup>th</sup> month         | 6.0 |
| 6   | Male   | 28  | Left distal femur      | Tumor resection and autograft                             | IIIb           | Brain metastasis/ Died in the 15 <sup>th</sup> month | 6.1 |
| 7   | Male   | 67  | Right distal femur     | Hip disarticulation                                       | IIIb           | Lung metastasis/ Died in the 10 <sup>th</sup> month  | 6.2 |
| 8   | Female | 13  | Proximal left tibia    | Tumor resection and prosthetic knee replacement           | Ilb            | Tumor free                                           | 5.8 |
| 9   | Female | 16  | Right distal femur     | Tumor resection and prosthetic knee replacement           | Ila            | Tumor free                                           | 3.3 |
| 10  | Female | 22  | Right distal femur     | Tumor resection and prosthetic knee replacement           | Ila            | Tumor free                                           | 5.8 |
| 11  | Male   | 19  | Right distal radius    | Elbow disarticulation                                     | Ilb            | Tumor free                                           | 6.1 |
| 12  | Female | 17  | Proximal left tibia    | Tumor resection and prosthetic knee replacement           | Ila            | Tumor free                                           | 3.2 |
| 13  | Female | 21  | Right distal femur     | Hip disarticulation                                       | Ilb            | Tumor free                                           | 4.1 |
| 14  | Female | 29  | Proximal left humerus  | Tumor resection and prosthetic shoulder joint replacement | Ila            | Tumor free                                           | 4.3 |
| 15  | Male   | 20  | Right distal femur     | Tumor resection and prosthetic knee replacement           | Ila            | Tumor free                                           | 4.1 |

|    |        |    |                        |                                                           |      |                                                      |     |
|----|--------|----|------------------------|-----------------------------------------------------------|------|------------------------------------------------------|-----|
| 16 | Male   | 16 | Left distal femur      | Hip disarticulation                                       | IIIb | Lung metastasis/ Died in the 14 <sup>th</sup> month  | 5.2 |
| 17 | Male   | 19 | Left distal femur      | Tumor resection and prosthetic knee replacement           | IIb  | Tumor free                                           | 4.4 |
| 18 | Female | 14 | Right distal femur     | Tumor resection and prosthetic knee replacement           | IIb  | Lung metastasis/ Died in the 30 <sup>th</sup> month  | 5.9 |
| 19 | Female | 31 | Proximal right femur   | Hip disarticulation                                       | IIIb | Lung metastasis/ Died in the 13 <sup>th</sup> month  | 6.0 |
| 20 | Female | 29 | Proximal right humerus | Tumor resection and prosthetic shoulder joint replacement | IIb  | Tumor free                                           | 3.9 |
| 21 | Male   | 36 | Right distal femur     | Tumor resection and prosthetic knee replacement           | IIb  | Lost follow-up in the 31 <sup>st</sup> month         | 2.1 |
| 22 | Female | 19 | Proximal left humerus  | Tumor resection and prosthetic shoulder joint replacement | IIa  | Tumor free                                           | 4.3 |
| 23 | Female | 16 | Right distal femur     | Tumor resection and autograft                             | IIa  | Tumor free                                           | 3.3 |
| 24 | Male   | 19 | Left distal femur      | Tumor resection and prosthetic knee replacement           | IIb  | Tumor free                                           | 3.0 |
| 25 | Male   | 27 | Right distal femur     | Tumor resection and prosthetic knee replacement           | IIa  | Lost follow-up in the 29 <sup>st</sup> month         | 2.8 |
| 26 | Male   | 22 | Proximal left tibia    | Tumor resection and prosthetic knee replacement           | IIb  | Tumor free                                           | 3.0 |
| 27 | Female | 19 | Left distal femur      | Tumor resection and prosthetic knee replacement           | IIIa | Brain metastasis/ Died in the 26 <sup>th</sup> month | 3.1 |
| 28 | Male   | 18 | Proximal left tibia    | Tumor resection and prosthetic knee replacement           | IIa  | Tumor free                                           | 5.7 |
| 29 | Female | 69 | Left distal tibia      | Knee disarticulation                                      | IIIa | Lung metastasis/ Died in the 32 <sup>th</sup> month  | 5.1 |
| 30 | Male   | 25 | Right distal femur     | Tumor resection and prosthetic knee replacement           | IIa  | Tumor free                                           | 4.5 |

|    |        |    |                      |                                                 |       |                                                     |     |
|----|--------|----|----------------------|-------------------------------------------------|-------|-----------------------------------------------------|-----|
| 31 | Male   | 20 | Left distal femur    | Tumor resection and prosthetic knee replacement | I Ib  | Lung metastasis/ Died in the 30 <sup>th</sup> month | 4.3 |
| 32 | Male   | 22 | Proximal right tibia | Tumor resection and prosthetic knee replacement | I Ia  | Tumor free                                          | 5.7 |
| 33 | Female | 25 | Right distal femur   | Tumor resection and prosthetic knee replacement | I Ia  | Tumor free                                          | 3.5 |
| 34 | Male   | 55 | Right distal tibia   | Knee disarticulation                            | III b | Lung metastasis/ Died in the 25 <sup>th</sup> month | 5.4 |
| 35 | Male   | 16 | Left distal femur    | Tumor resection and prosthetic knee replacement | I Ia  | Tumor free                                          | 3.4 |
| 36 | Female | 17 | Proximal left tibia  | Tumor resection and prosthetic knee replacement | I Ia  | Tumor free                                          | 3.1 |
| 37 | Male   | 23 | Right distal femur   | Tumor resection and prosthetic knee replacement | I Ib  | Lost follow-up in the 11 <sup>st</sup> month        | 5.6 |
| 38 | Male   | 19 | Left distal femur    | Tumor resection and prosthetic knee replacement | I Ia  | Tumor free                                          | 3.2 |
| 39 | Female | 21 | Left distal femur    | Tumor resection and prosthetic knee replacement | I Ib  | Lung metastasis/ Died in the 36 <sup>th</sup> month | 3.6 |
| 40 | Male   | 19 | Right distal femur   | Tumor resection and autograft                   | I Ib  | Lost follow-up in the 26 <sup>st</sup> month        | 5.7 |
| 41 | Male   | 18 | Proximal right tibia | Tumor resection and prosthetic knee replacement | I Ia  | Tumor free                                          | 3.6 |

**Correlation with MUC15 expression and clinical characteristics**

| Clinical characteristics | n  | MUC15            |          |
|--------------------------|----|------------------|----------|
|                          |    | Expression level | p        |
| Age $\leq$ 24            | 29 | 4.35 $\pm$ 0.23  | 0.48     |
| Age $>$ 24               | 12 | 4.66 $\pm$ 0.40  |          |
| Male                     | 22 | 4.52 $\pm$ 0.27  | 0.68     |
| Female                   | 19 | 4.35 $\pm$ 0.29  |          |
| Ennking stage(II)        | 33 | 4.21 $\pm$ 0.21  | 0.01 (*) |
| Ennking stage(III)       | 8  | 5.41 $\pm$ 0.37  |          |
